# Supplementary material for: Controls on phase composition and ice water content in a convection permitting model simulation of a tropical mesoscale convective system
Source: Copernicus journal article supplement (doi:10.5194/acp-2015-970), 2016-01-19
Supplement: Supplementary file [file acp-2015-970-AC1-supplement.pdf]

## Response to Anonymous Referee #1

We'd like to express our gratitude to the reviewer for their insightful review and we believe that the revised paper is significantly improved thanks to their comments and suggestions.

This manuscript explores a very interesting topic with many outstanding questions, namely the controls on mixed phase hydrometeor properties in deep convection. A large number of sensitivity simulations are performed of an MCS case near Darwin, Australia, for which there are ground radar and aircraft in situ measurements for comparison. Given the unique observational dataset and important topic, the manuscript is certainly worthy of eventually being published in ACP, but there are many major issues that need to be addressed before this can happen, and it will likely take the authors a long time to address all of these issues in a satisfactory manner. The most important of these issues are the flawed methodology for comparing very limited observations with very ample model output and the large amount of unsubstantiated assertions that are passed off as conclusions without evidence. These and other issues are discussed in much more detail below, and a number of suggestions are offered that provide paths forward to overcoming the major shortcomings of the manuscript.

### Major Comments

1. The comparison of a single sounding with the model sounding is nowhere close to representative of environmental differences between the model and observations. In fact, the observed sounding is a classic "onion" sounding in a stratiform region where the low level air is completely stable and mid level air is dried out because of the mesoscale downdraft. This is not the air that is feeding the system (it thermodynamically cannot be since it is stable), and convective cloud base from lifted boundary layer parcels would be below 1 km, as it nearly always is in Darwin active monsoon conditions. In the stratiform region, where these soundings are taken, the cloud base is typically around the melting level, which is where the soundings approximately show it. The humidity profile will vary depending on where you take the sounding in the stratiform region, so you also cannot draw conclusions about upper tropospheric humidity. The likelihood that the model sounding is in a stratiform region location that is exactly like the one observed is practically zero, so no conclusions regarding model environmental biases can be drawn from this comparison. The winds are also not representative and examination of CPOL radial velocity shows that low-mid level winds are quite variable because of the MCS forming in a trough convergence region and the mesoscale circulations induced by the stratiform precipitation. Therefore, you should remove all conclusions based on comparison of these soundings. The prior Darwin sounding at 12Z (attached as Fig. 1) before the system initiates shows a classically active monsoon environment and one that is probably similar to the one that the convection develops in 6 hours later, so you can compare that to the model, but it is still not okay to draw conclusions about model environmental biases from one sounding because humidity, winds, and instability are highly variable across mesoscale domains (you can prove this to yourself by plotting them using the model output), so if you choose to include a comparison of 12Z soundings, you should plot a spread of model soundings outside of clouds and precipitation and place the observed sounding in this spread. If the spread covers the one observed sounding, you cannot conclude that there are biases in model environmental representation. Otherwise, simply remove the comparison of observed and modeled soundings. There could be environmental representation biases, but it is nearly impossible to show that given the available observations, and this is not the purpose of the manuscript anyway.

The comparison of the model with the sounding has been removed.

2. The timing and location of this observed MCS are very important for how it needs to be compared to model output. After the initial deep convective stage when convection is most intense, a large stratiform region forms and the most intense convective cells push westward outside of CPOL coverage before the aircraft even begins sampling the system. The aircraft then samples the remnant stratiform region and weak convection that is not representative of the convection that forms the MCS. It is unlikely that the simulations reproduced this lifecycle (in fact Figure 3 shows that they did not), but this lifecycle strongly impacts interpretation of comparisons between model output and observed reflectivity and aircraft observations in some of the figures (i.e., is some of the model error because of a different system evolution in terms of timing and location?). Therefore, the figures showing statistical comparisons would be greatly aided by showing observed and simulated (just pick a representative simulation – the time series show that they have similar evolutions) low level reflectivity during a couple times between the initial intense convection and the decaying stages when the aircraft was making observations.

Additional figures and discussion have been included that describe the plan view of OLR for the observations and control model, as well as the 2.5 km radar reflectivity fields from the radar and control simulation.

The added text for the OLR reads: Comparison of the modelled outgoing longwave radiation (OLR) with the satellite observations in Figure 2 show that in general, the control simulation represents the lifecycle of the MCS fairly well. The location of the mostly oceanic convective cells look reasonable, however, the modelled MCS is larger and composed of more numerous and deeper convective clouds than what was observed in the pixel level satellite OLR data and seen in the low level radar reflectivity fields shown in Figure 3. The model also produces more convection over the Tiwi Islands than what was observed at 17:30 UTC. As the MCS transitions from a developing-mature system through to a mature-decaying system, the observed reduction of deep convective cells with time is simulated, although the OLR remains significantly underestimated. During the research flight at 23:30 UTC, the modelled MCS shows cloud positioned in a similar location to that observed with respect to the MCS structure, however, the modelled cloud is shifted somewhat to the northeast.

3. In the paragraph that starts at the bottom of page 9 and continues onto page 10, I disagree with your reasoning that the underestimate in precipitation at later times is a result of drier low-mid levels. First, you can't determine whether they are drier or not given the available observations, and second, Figure 3 shows that the simulated MCS develops about 2 hours earlier than the observed one. If you shift the simulated precipitation time series to 2 hours later, then the evolution of the precipitation is very similar in the simulations and observations. In the second part of this paragraph, you state that lack of stratiform rainfall is not caused by excessive evaporation (even though earlier in the paragraph you partly blame drier low-mid level air) and instead blame overly strong convection that detrains too high in the troposphere. This could be going on, but you show no evidence of low biased stratiform rainfall or overly strong convection, so this is purely speculation and should be removed unless you add evidence to support it.

The references to the moisture bias have been removed in accordance with comment 1. With respect to the evolution of the simulated MCS see the response to the point above. The additional figures of the plan views of radar reflectivity and OLR support the results that the model produces overly strong convection that detrains too high, and the lack of stratiform rainfall is evident in the radar reflectivity figures.

4. In Figure 3d, the satellite retrieved OLR looks incorrect. I checked the satellite observations between 18 and 21Z and they show OLR less than 125 W m<sup>-2</sup> covering the entire domain (see attached Fig. 2 for 21Z OLR), whereas your figure shows 160 W m<sup>-2</sup>.

Therefore, your conclusions on page 11, lines 16-24 are incorrect. Perhaps you are averaging over too large of a region for the comparison?

This figure has been removed and has been replaced by the plan views of the higher resolution OLR observations (that you showed in your review, rather than the coarse resolution observations that were used) at 4 different times.

5. Because so many model sensitivities are examined, I don't think that any single sensitivity is given the detail that it deserves to understand the mechanisms behind changes in model output. This leads to a lot of speculation throughout the manuscript without much evidence shown. Some speculation is fine, but the speculation is passed off as facts in a number of spots including in the conclusions. Here is a list of examples:

a. On page 10, lines 26-31, your explanation regarding differences in RH profiles between simulations with different ice PSDs may be reasonable, but you do not provide evidence showing riming rates connected to latent heating connected to convective updraft strength. Unfortunately the model output is not available to analyse the latent heating generated from the riming rates. As such the discussion here has been revised to read:

The higher RH in the simulations using the generic ice PSD could be due to the larger, faster falling particles in the levels below 12 km removing more of the LWC via riming, which would allow for greater supersaturation. More riming would release more latent heat, which along with the larger ice particles being more effectively off-loaded, could lead to the generation of stronger updrafts with less entrainment and higher RH in the upper troposphere.

b. On Pages 10-11, you discuss convective entrainment but you are showing domain mean horizontal mass divergence in Figure 5, which incorporates all regions (convective, stratiform, neither) so you can't assume that differences in mass divergence profiles are related to convection alone. Furthermore, more than entrainment impacts convection. The location of the convection (differing surrounding environment) and the low level convective forcing influence the strength of the convective updrafts, and mass divergence incorporates all updrafts and more, so one simulation can simply have more updrafts reaching a certain height level than another simulation, but the entrainment and strength characteristics of the updrafts may be the same. To claim what you claim, you'd have to isolate convective updrafts (perhaps by using a vertical velocity threshold) and compute their buoyancy and detrainment. I also don't understand your argument on lines 3-6. Why would simulations that have the least mass divergence at upper levels be consistent with updrafts that penetrate higher and higher mean cloud tops?

The horizontal mass divergence figure has been revised to show the mass divergence for the convective updrafts with vertical velocity  $> 1 \text{ m s}^{-1}$ . The key results shown do not change. Included in this figure are additional panels that show the convective updraft buoyancy plotted as a function of equivalent potential temperature. These figures support the results deduced from the horizontal mass divergence: greater turbulent mixing at 6 km produces many more occurrences of convective updrafts with reduced equivalent potential temperature, indicative of increased entrainment, and; at 14 km a simulation with smaller ice particle sizes shows considerably fewer occurrences of high equivalent potential temperature, indicative of greater entrainment. Further to this, the figure also includes the histograms of convective updraft buoyancy that show a greater number of occurrences of more positively buoyant clouds at 14 km for the simulations that have larger sized ice particles, supporting the result that less mass divergence represents less entrainment with more positively buoyant updrafts that penetrate higher. This additional reasoning has been added to the manuscript.

See the response to comment 5d below about the analysis of environment differences.

c. On page 18, lines 12-14, differences in entrainment and water loading may impact the convective updraft strength and max reflectivity profile, but this is speculation and the correlation between lines in Figure 11c and Figure 10b is far from perfect. To show this, you could plot these variables vs. one another to provide evidence. Another cause of simulation

differences includes possible differences in the positioning and/or timing of convection. For example, for 17-18 UTC, the max reflectivity profile comparison looks quite different than for 23-24 UTC. If entrainment and water loading buoyancy differences caused by the turbulence or microphysics parameterizations are primarily controlling updraft strength and max reflectivity, then why is this the case?

This discussion is focussed on explaining the differences between 3 simulations, not all simulations, and these 3 simulations show a correlation between maximum reflectivity profiles and maximum vertical motion. These 3 cases all use the same ice PSD and only differ in their dynamical and turbulence parameterisations. The comment regarding entrainment and water loading was described to be the “likely” reason and is supported by the results in Figures 5 (see response to comment c above) and the accumulated water contents, as described in the text.

See responses to comment d below (for differences in environment) and minor comment 18 (for differences in max dBZ at 17 – 18 UTC).

d. On page 18, lines 27-29, how do you know extra latent heating is occurring without compensation by entrainment or water loading in the ENDGame simulation? Latent heating is one component of buoyancy, but the environment could also be different.

Analysing the vertically integrated moist static energy for the simulations across the time period 12 – 24 UTC, shows that the large scale environment is very similar across all of the simulations with the differences being  $< 0.8$  K (when normalised by the specific heat capacity of air). The precipitable water differences are also small, around 1 mm, demonstrating that environment changes are unlikely to be responsible for the differences seen. However, since there could be a contribution, the sentence has been modified to read:

In this simulation it seems as though the stronger and deeper updrafts are able to generate enough latent heating that this effect on buoyancy is larger than that of entrainment and water loading as compared to the other cases.

e. On page 21, lines 4-6, why can't increases in IWC with vertical velocity be the result of higher vertical velocities lofting more condensate upward?

This sentence explains why there is an increase of ice in this temperature regime, as compared to the warmer regimes where the IWC does not increase with vertical velocity. Since all regimes have advection of ice, the difference is caused by the heterogeneous freezing that occurs in this regime and not the others. The sentence has been revised to clarify this.

f. On page 21, lines 17-22, how can you draw any conclusion regarding change in IWC with height in observations with so few samples? If you look data from all of the flights and RASTA, they would disprove this result. Furthermore, where do the simulations support the drop in IWC between -20 to -10\_C and -30 to -20\_C? The distributions for both temperature regimes look very similar.

The observations from all of the Darwin flights have been added to this figure. The results also show a general trend to reduce the IWC for a given vertical velocity for the coldest regime analysed, but as with the simulations, the reduction is subtle. Because of this the discussion has been deleted.

g. On page 22, lines 23-25, why do you bring up the aerosol invigoration effect if your figures do not support it? For example, Figure 11c shows weaker max vertical velocities when cloud droplet number concentration is increased while Figure 16 shows that total ice mass is not changed.

This has been deleted.

h. On page 23, lines 13-16, I don't see a change in 90th percentile cloud vertical velocity in Figure 11, but they aren't as relevant as convective vertical velocity anyway, since it is in convective updrafts (not reflected in 90th percentile cloud upward motion of 0.2 m/s) where Hallett-Mossop is operating. If you examine the max vertical velocity in Figure 11, which is convective, it shows a decrease in vertical velocity by including Hallett-Mossop. Also, how do you know that including Hallett-Mossop increases latent heating? Can you show this?

This sentence has been deleted.

i. On page 24, lines 19-21, you claim that a bimodal PSD representation or a larger observational dataset to generate a more applicable PSD parameterization that correctly

represents snow sizes. This is not necessarily true, and I don't see any evidence presented that the two modes of the ice size distribution are important to represent. In fact, the simulated ice size distribution is already bimodal or trimodal because of 2-3 separate ice categories. The fact is that a single-moment scheme will always struggle if it has to represent convective regions dominated by small ice particles and stratiform regions dominated by aggregating large ice particles. This instead suggests that a two-moment scheme that predicts number concentration in addition to mass is needed, and even then, as you show in the manuscript, microphysical and turbulent processes need to be properly parameterized as well, since they impact the predicted PSD moments that define the PSD. [The mention of the bimodal PSD has been deleted. Instead the text is modified to discuss the better ability of double moment microphysics schemes to represent the observed PSD variability, as suggested.](#)

j. On page 26, lines 4-12, you say that you show convective updraft buoyancy, but you don't show this or latent heating in the manuscript. Everything related to convective buoyancy and entrainment/detrainment is speculation.

[See response to comment 5b.](#)

k. On page 26, lines 15-23, you don't have a figure where it is possible to discern the slope of reflectivity above the melting level. This is not shown by Figure 6, which shows that the coverage of different reflectivity thresholds is different in simulations and observations, but doesn't show profiles of reflectivity. Furthermore, the slope of snow mean size in Figure 4c looks similar in observations and simulations using the generic PSD and the difference in diameters for 0.5 g m<sup>-3</sup> in Figure 17 is not robust and strongly affected by very few observation samples between 0 and -5\_C. So overall, I don't see a lot of evidence that implicit aggregation based on the shifting temperature- dependent PSD is too weak.

[This discussion has been removed.](#)

l. Of your 4 listed model shortcomings on page 28, "too much rain above the freezing level", "too little entrainment", "increases the stratiform cloud and rain area", and "too efficient depositional growth" are all statements that are not supported by any evidence shown. They are speculation for explaining the figures that you show, but they are not the only possible explanations for the figures that you show.

[The depositional growth statement has been removed based on comment 8 below.](#)

[With respect to the model having too much rain above the freezing level, this is shown in the comparison of the observed radar reflectivity fractional area coverages with the control model. The > 40 dBZ areas in the model \(that are not seen in the observations\) are almost exclusively due to rain, as confirmed by producing the same figure when the only hydrometeor category used is rain. The aircraft observations also support the lack of supercooled water, which is produced by both cloud water and rain in the model at the times when the aircraft flew.](#)

[We agree with the point about too little entrainment. This sentence has been revised to read:](#)

[Too little stratiform rain area is increased with increased turbulent mixing.](#)

[An additional row of panels is now included in the reflectivity fractional area coverages figure for the simulation that has increased turbulent mixing. This shows an increase in the stratiform cloud and rain compared to the control simulation.](#)

6. By heterogeneous rain freezing, do you mean heterogeneous nucleation by ice nuclei or all freezing mechanisms other than homogeneous freezing? This is unclear in the text. You state that because including heterogeneous rain freezing produces better agreement between observations and simulations, it must be important in tropical convective cloud systems (e.g., page 15, lines 11-12), but the simulation including heterogeneous rain freezing only slightly improves on the simulation without it, getting nowhere near observations. With such a difference between the simulation and observations, can you confidently trust that a change in the model is reflective of a change in the real world? For



example, what if real tropical convective updrafts loft fewer raindrops than the model does for a given updraft strength. Then the effect of heterogeneous rain freezing in the model will have a larger impact than in real life.

The text has been revised to clarify that the heterogeneous rain freezing is heterogeneous nucleation by ice nuclei.

We agree that there is no way to definitively conclude from these simulations that the effects of the addition of this process are expressed in the model in the same way as they are in the real world. That is why the statement that you refer to suggested, rather than concluded, that this process is important. We have added the caveat here that reads: However, given the errors in the dynamics and microphysics in the model for this case, further study is required to better understand the effects of this process.

7. The discussion about cloud base on page 19 is incorrect since the inferred cloud base from the stratiform sounding (as discussed in point #1) is incorrect, so I suggest removing this discussion. Cloud base for rising low level air is certainly not 3 km. The argument in lines 15-17 does not make sense to me either. Latent heating by condensation can make air buoyant, but only if this heating makes the air warmer than the environment, which is never guaranteed. Buoyancy accelerates air, so vertical velocity is a function of vertically integrated buoyancy. Therefore, any peak in updraft strength will occur at higher altitudes than peak buoyancy and peak buoyancy is often offset from peak latent heating. In this paragraph and later discussions in the manuscript referencing Figure 11, there is also confusing wording equating in-cloud upward vertical velocity with convective updraft vertical velocity. These are not the same. The 90th percentile upward vertical velocity in Figure 11e is  $\sim 0.2$  m/s, which can easily be achieved in many non-convective cloud types. To confine your analysis to convective updrafts would require some minimum threshold vertical velocity of 1-2 m/s.

The cloud base and associated buoyancy discussions have been removed. The later references to the Figure 11 percentiles and convective updrafts have been deleted.

8. Be careful interpreting aircraft humidity measurements in convective updrafts. Such measurements can and often do have large errors. Because of this and the small number of updraft samples biasing any statistical comparison, I would not trust any of your conclusions in the second paragraph on page 23.

Based on this comment we analysed the RH observations from all of the Darwin flights. This analysis confirmed that there are erroneous observations and, therefore, this figure and discussion have been removed.

9. Your reasoning on page 24, lines 10-15, doesn't make sense to me. For the generic ice PSD, if mean sizes are overestimated for  $IWC > 0.5$  g m<sup>-3</sup>, that means that this PSD has larger concentrations of large particles than observed, not smaller as is stated. This is the only way that mean sizes can be larger for a given IWC.

The sentence has been revised as suggested.

10. The overall text could be shortened and streamlined. It reads like a "stream of consciousness" at times, which makes finding the key points difficult. This is particularly true because of the large number of sensitivity simulations that you want to describe. I recommend cutting out minor points so that the readers do not get so easily distracted away from the key points. One way to do this is to simply focus on the couple of model component changes that create the biggest effects for whatever variable you are examining. This would

also free up space to show evidence supporting your theories (as listed in point #5) for why these specific changes cause the observed effects. You could also cut out some of the simulations if they don't make much of a difference and just say that they don't make a difference. This would unclutter the plots.

The text describing the simulation results has been significantly reduced to focus on the key points. We decided to leave all of the simulations in the figures so that the interested reader can examine the results for each of the cases tested. Due to the addition of more detailed descriptions of the observations and previous studies (comment from the other reviewer), the overall length of the paper has reduced by 2 pages and 3 figures.

11. For comparisons between model output using 1-km grid spacing and 1-Hz aircraft observations ( $\sim 150$ -m sampling), do you average the aircraft observations to a 1-km grid before making comparisons? If not, please do this and include this information in the manuscript. Also include information for how the vertical velocity is retrieved from aircraft measurements, how water vapor is subtracted out of IKP evaporator probe measurements, and why IKP retrievals are assumed to be IWC rather than TWC (a combination of liquid and ice). If they are rather used as TWC, then making comparisons to simulated TWC (IWC + LWC) would potentially change some of the conclusions in the manuscript.

All of the observations are averaged to a 1 km grid before any analysis. The following text has been added to the paper in the section describing the observations:

Since the IKP-2 measures the total water content, liquid water and water vapour contributions should be subtracted to obtain IWC. Unfortunately, the hot-wire LWC sensor on the aircraft was unable to measure LWC below about 10% of the IWC in mixed phase conditions, and LWC levels exceeding this value were very rare. Fortunately the Goodrich Ice Detector could be used to detect the presence of liquid water. Two such regions in two very short flight segments for this case, research flight 23, were identified at  $-10^{\circ}\text{C}$ , and these regions have been excluded from the analysis. The minimum detectable IWC of the IKP-2 is determined by the noise level of the water vapour measurements of the IKP-2 and background probes. This resulting noise level of the subtraction of the background humidity from the IKP-2 humidity is a function of temperature: it is about  $0.1 \text{ gm}^{-3}$  at  $-10^{\circ}\text{C}$ , dropping rapidly to about  $0.005 \text{ gm}^{-3}$  at  $-50^{\circ}\text{C}$ . Since most data were taken at temperatures colder than about  $-25^{\circ}\text{C}$ , a minimum IWC of  $0.05 \text{ gm}^{-3}$  was chosen as the threshold to include in our analysis.

Two sources of vertical velocity are used from the Falcon 20. Position, orientation and speed of the aircraft are measured by a GPS-coupled Inertial Navigation System. The 3-D air motion vector relative to the aircraft is measured by Rosemount 1221 differential pressures transducer connected to a Rosemount 858 flow angle sensor mounted at the tip of the boom, ahead of the aircraft, and by a pitot tube which is part of the standard equipment of the aircraft. Wind in local geographical coordinates is computed as the sum of the air speed vector relative to the aircraft, and the aircraft velocity vector relative to the ground. Both computations use classical formulas in the airborne measurement field described in Bange et al. (2013). The other vertical air velocity measurement used is retrieved from the multi-beam cloud radar observations using the 3D wind retrieval technique described in Protat and Zawadzki (1999), and we use the technique described in Protat and Williams (2011) to separate terminal fall speed and vertical air velocity. Comparisons near flight altitude with the aircraft in-situ vertical velocity measurements show that the vertical velocity retrieval is accurate to within  $0.3 \text{ m s}^{-1}$ . All observations are averaged to the model 1 km grid.

We also note that the significant overestimate of IWC by the model means that whether the aircraft IWC is taken as IWC or TWC will not change the conclusions from the model-aircraft comparisons.

12. The comparisons of model output with aircraft observations are not robust because of the low observational sample size in updrafts and downdrafts (e.g., Figures 11c, 12, 15, 17). In fact, the aircraft only penetrated 4 updraft cores at -12\_C, 1 at -18\_C, and then flew through the edges of a few others around -25\_C. You admit as much in a few places in the manuscript, but then attempt to draw conclusions from the comparison about which simulations are most realistic, which isn't possible in convective updrafts or downdrafts for this case alone. Therefore, the plots with these comparisons are not appropriate since the model output is a mean relationship with many samples (essentially a population mean) while the observations are but one, likely unrepresentative sample. There are two ways that this issue can be corrected: a. Include aircraft data from the other field campaign flights to make the sample size more robust. These are different cases, but the sampling for this one case is already biased anyway as mentioned in point #2. Furthermore, the aircraft avoided cells with lightning (the most intense cells) in all cases and the most intense cells in this 18 February case had plenty of lightning, so no matter what, the aircraft is always sampling convection in all flights that is weaker than the most intense convection in this case. Furthermore, as your coauthors know, there are RASTA W-band radar retrievals of vertical velocity and IWC that can be used at temperatures colder than -20\_C and would increase the observational sample size to make comparisons with model output more robust. b. Sample the model output with pseudo-flight tracks (E-W or N-S is fine) and limit the total sample size to the same as that observed. Do this a number of times to get a population of samples that are each directly comparable to the observed sample. Then the observed sample can be compared to the distribution of samples drawn from the model to see if it fits into the model spread or not. If it does, you cannot say that the model is wrong. If it doesn't, then you can say that the simulation and observations are different. Without this method, any conclusions drawn on the difference between the model output and aircraft observations are unfounded.

As suggested, the model and aircraft comparisons now include the observations from all of the Darwin research flights. The RASTA derived vertical velocity has also been used. Additional text has been added to the beginning of the section comparing the simulations to the aircraft. It reads:

Due to the small sample size of observations from the single research flight on 18/02/2014, the observations from 18 of the Darwin HIWC flights have been used to allow for a more robust comparison of the model to the observations (Fig. 12 and 14). The majority of the flight time for these cases was in clouds with temperatures < -10 °C and vertical motions within the range of -2 to 2 m s<sup>-1</sup>. Therefore, when comparing the model to the aircraft observations the focus is on this subset of cloud conditions as there are limited observational samples outside of these ranges.

The text describing the comparison of the simulations to the aircraft observations has been modified accordingly, but we note that apart from the increasing IWC in the downdrafts, the main conclusions have not changed.

13. You restate many of the results in the conclusions section making it rather long (4 pages). I suggest cutting much of this repetitive text out and focusing on key general points like you attempt to do at the very end of the conclusions section.

The conclusions section has been almost halved and now focusses on the general key points.

#### Minor Comments

1. On Page 6, lines 17-18, you say that graupel formation does not including freezing rain. Do you mean heterogeneous freezing of rain by ice nuclei? Surely, if a raindrop homogeneously freezes or freezes through contact with an ice particle, it should go in the graupel category, no?



This has been revised to read heterogeneous freezing of rain by ice nuclei.

2. On the bottom of page 7, you should also note whether the particle probes have anti-shattering tips or not.

The use of anti-shattering tips has been added to this discussion.

3. On page 8, line 11, you should note the resolution of the peak ice water content since ice water contents strongly depend on resolution.

The resolution of 1 s has been added.

4. On page 8, lines 24-26: The problems with moisture related to domain size are related to periodic lateral boundaries, but you use a nested simulation where moisture can leave the innermost domains, so I'm unsure as to why this discussion is relevant. As I note in major comment #1 though, your conclusion that the model has a moisture bias is not robust because the soundings are not representative, so I would remove all discussion of it or replace it with the comparison I suggest.

This discussion has been removed.

5. For your comparisons in Section 3.1, please state whether you are using the full model domain or the CPOL domain defined by the range ring in Figure 1 to calculate model domain mean quantities.

Text has been added to specify that these comparisons use the radar domain.

6. On page 9, lines 21-23: I'm not sure why you cite Fridlind et al. (2012) here to say that the simulated domain mean precipitation rate is outside of the radar-derived precipitation rate range of uncertainty. You also don't show the uncertainty range. If you examined that, why not show it using vertical bars in Figure 3a?

The uncertainty referred to here is the uncertainty of the rainfall retrieval that considers things like the sensitivity of the radar and calibration issues.

7. On page 10, line 23, in Figure 4, and throughout the manuscript, when you say "mean ice particle sizes", how are mean sizes calculated? Are these mass-weighted mean diameters or something else? Please clarify this throughout the manuscript.

The only measure of mean size used is the mass weighted mean diameter. This has been clarified here and elsewhere.

8. On page 11 and for Figure 3, how do you define cloud top in simulations?

The figure of cloud top heights has been removed.

9. On page 12, line 21, 23, and 29: A C-band radar cannot observe cloud top or the fraction of the domain covered by hydrometeors since it is only sensitive to precipitation sized hydrometeors, so clarify this by referring to the reflectivity echo coverage.

Modified as suggested.

10. How can you tell that the control simulation evolves from scattered to more organized convection with stratiform regions from Figure 6? I suggest showing this as I state in major comment #2.

See response to major comment 2.

11. On page 13, lines 27-28, the excess large particles above the freezing level can also be related to insufficient representation of the rain DSD, warm rain processes, and/or rain sedimentation (representation of fall speeds and size of updrafts being too large).

This has been modified to read: The simulated rain above the freezing level that is not observed suggests that the model has faster updrafts than observed, which loft large rain particles upwards and/or the heterogeneous freezing of rain that is not represented in the model is an important process in tropical convection and/or other errors in the representation of the rain DSD.

12. On page 13, line 31: This is true of raindrops and cloud drops, but the lower temperature limit should be 0\_C as many raindrops freeze quickly at relatively warm temperatures from contacting entrained ice particles starting at 0\_C.

This has been left unchanged as the observational evidence cited has a lower limit of -6 °C.

13. On page 14, lines 16-19, I doubt this is the reason for the non-prominent bright band in observations. It is much more plausible that the radar beam smears the bright band out because this data is taken from volumetric scans and more data is far away from the radar than close to it (because of radar coverage increasing as range ring radius squared). Despite this, you still see a bump at 4 km height corresponding to the bright band.

Thank you for this information. The text has been modified to read: The lack of a predominant bright band in the observations is likely due to the data being collected from volumetric scans, however, there are slightly higher reflectivities seen at 4 km indicating a bright band.

14. On page 15, lines 14-16, single moment schemes typically do increase the number concentration as IWC increases. Aggregation is a decrease in number concentration for no change or an increase in IWC. This can also be diagnostically represented in single moment schemes by altering the PSD as a function of temperature though. For example, the Thompson microphysics scheme (Thompson et al. 2008) commonly produces the best agreement with observed stratiform reflectivity profile above the melting level. Two-moment schemes can explicitly represent aggregation through predicting the number concentration, but also typically overestimate reflectivity aloft because other factors include excessive size sorting, mass-size relationships, and the assumed PSD shape.

This sentence has been deleted.

15. On page 17, line 4, the aircraft observations are mostly in stratiform precipitation (plot the flight track on top of the CPOL reflectivity and you'll see this clearly) even though the aircraft penetrates a few weak deep convective cores. The highest concentrations are found in convective cores, not in stratiform regions, so having convective observations does not make them lesser than the ones in Field et al. (2007), which also include convective observations. The observations in Field et al. (2007), however, may suffer from ice shattering artifacts, so they may not be directly comparable to these new aircraft observations that mitigate and control for shattering.

With regards to the first part of this comment, the text has been revised to read: The observations in this case may be in a different type of cloud environment from the data used to construct the Field

parameterisation, as suggested by the observed number concentration being below the lower range shown in Field et al. (2007).

As was stated, the data used in this comparison was only for particles > 100 microns in diameter to be consistent with the data used to derive the Field et al. (2007) parameterisation. They did this to minimise the effects of shattering. Because of the use of this minimum diameter, the effects of shattering should not significantly bias the comparison.

16. From Fig. 10, it looks like there is an issue in limiting hydrometeor sizes to realistic values in the microphysics scheme you are using. A rain reflectivity of 75 dBZ is physically impossible because raindrops begin breaking apart at large sizes. In the real world, rain reflectivities are limited to less than ~55-60 dBZ. Some schemes implement limits on the slope of the rain DSD, and that may need to be done for this scheme.

Thank you for providing this information that is useful for future model development.

17. On page 17, line 18, the observed decrease in max reflectivity above 2 km may also be from raindrops falling through weak updrafts and collecting cloud droplets in the classic warm rain process.

Yes this could also be occurring and has been added to the text.

18. On page 17, lines 22-24: This is true that different subgrid turbulent mixing decreases max reflectivity, but only for 23-24 UTC and not for 17-18 UTC. Why?

Analysing the maximum updrafts at the earlier times shows that the difference between the simulations at this time is much smaller than the later times, and the updrafts are stronger with all simulations showing > 20 m s<sup>-1</sup> in the upper troposphere. The stronger updrafts allows for very large particles to be advected to the upper levels in all of the simulations resulting in little difference in maximum dBZ at these times.

The text has been modified to read: There is little spread in the maximum reflectivity profile across the simulations at 17 – 18 UTC, with strong updrafts > 20 m s<sup>-1</sup> in all simulations (not shown) that allows large particles in all simulations to be advected into the upper troposphere.

19. On page 17, lines 24-27, I can't clearly see the reduction in max reflectivity caused by implementing the heterogeneous rain freezing parameterization. Perhaps increase the symbol sizes so that the different lines can be seen more clearly.

The figure has been replotted with larger symbol sizes.

20. On page 19, lines 19-21, the upper level vertical velocity peak is also a result of vertical velocity being related to vertically integrated buoyancy. CAPE is usually distributed over a significant depth and the updraft will accelerate as CAPE is used up, primarily being limited by entrainment and opposing pressure gradients. Freezing of condensate and unloading of condensate simply help to push the peak higher.

This sentence has been revised to read:

The upper level updraft peak has been observed (e.g. May and Rajopadhyaya 1999) and is argued to be due to the deep column of convectively available potential energy in the tropics, coupled with latent heat released by freezing condensate and the unloading of hydrometeors, both of which increase parcel buoyancy.

21. On page 20, lines 23-24, you state that the reduction in rain by heterogeneous freezing reduces accretion of cloud water and thus increases the cloud water mass. Why don't the graupel particles formed by the freezing raindrops accrete the cloud water through riming? Is this related to lower cloud droplet collection efficiency by graupel than rain?

Yes thank you for picking up on this, changes between the accretion of rain and riming of graupel due to differences in the size distributions affect the cloud water removal. This has been modified to read: This is due to the reduction in the riming of cloud water by graupel as compared to the accretion of cloud water by rain.

22. On page 20, lines 25-28, how do fast fall speeds of particles help to generate downdrafts? I think of the loading and evaporation, mostly relating to rain in the tropics, as primary drivers. Do fast fall speeds impact loading and evaporation? Also, on lines 28-30, why does more accumulated graupel mass being correlated with the largest IWC in downdrafts support the argument that fast graupel fall speeds generate downdrafts? Do the strongest downdrafts have the most graupel? If so, that would be a supportive argument.

This has been revised to read: ... where the suggestion is that these larger particles help to generate downdrafts through mass loading.

Analysing the IWC for the downdrafts in the warmest regime shows that the largest source of ice is indeed graupel. The text has been revised to read: This argument is supported by analysis of the downdraft IWC that shows that the majority of the ice in the downdrafts is graupel. For example in the control simulation, 82% of the ice mass is graupel for the warmest regime downdraft of  $5 \text{ m s}^{-1}$ .

23. On page 22, lines 29-30, I don't see a reduction in total accumulated ice mass in Figure 16. Am I missing something?

This refers to the "accumulated amount of aggregate mass" not the total (aggregate + crystal + graupel) ice mass.

24. On page 25, line 5, you claim that the simulations capture the timing of the deepest convection well, but Figure 3 suggests that the simulations initiate and organization deep convection earlier than observed, as you suggest on lines 9-10.

While the simulations do produce deep convection in the radar domain earlier than observed, the timing of the deepest convection observed at 17 – 18 UTC is also when the greatest amount of deep convection occurs in the simulations, as shown for example in OLR plan views and the statistical radar coverage figure, which shows the more vertically aligned contours in the simulations after 17 UTC. The sentence has been modified to read: Analysing 12 hours of observed and simulated radar reflectivity has shown that the simulations capture the intensification and decay of convective strength associated with the lifecycle of the MCS, with the timing of the greatest amount of deep convection represented well.

25. On page 25, lines 16-19, what is your definition of "large" particles? Reflectivity is more sensitive to large particles than small particles but a large number of small particles can give the same reflectivity as a small number of large particles, so it seems that you are using an arbitrary reflectivity value here to define large vs. small particles.

This sentence has been deleted.

26. On page 25, line 32, and page 26, line 2, you mention the percentiles of updraft speed, but your figure shows 90th percentile cloud upward motion, which isn't necessarily correlated

with max reflectivity since most of the cloud volume is not convective updrafts where the max reflectivities are occurring.

The reference to the 90<sup>th</sup> percentile has been deleted.

27. On page 26, lines 24-25, do you mean that the heterogeneous rain freezing parameterization reduces raindrops above the freezing level rather than reducing the lofting of raindrops? A freezing mechanism shouldn't impact raindrops lofting above 0\_C, right?

This has been modified to read: The beneficial impact of including a rain heterogeneous freezing parameterisation was shown through the reduction of large raindrops above the freezing level, which was not observed by the radar or aircraft and supports previous observations that show that most drops in oceanic convection freeze between -6 and -18 °C (Stith et al. 2002).

28. On page 26, lines 26-28, raindrops not being lofted above the freezing level cannot be detected by radar reflectivity and the aircraft was clearly observing the MCS during its decaying stage, not its mature stage, based on the time series shown in Figure 3. Updrafts, even weak ones, commonly loft raindrops above the 0\_C level, but it is true that most of them freeze rather quickly. That is different though than what you state here, that raindrops are not lofted above the 0\_C level, which is not supportable from available observations.

See the point above.
